# Supplementary material
Source: MDPI journal article supplement (https://www.mdpi.com/2227-9040/11/7/370)
Supplement: s1 [file s1 › chemosensors-2449585-supplementary.pdf]

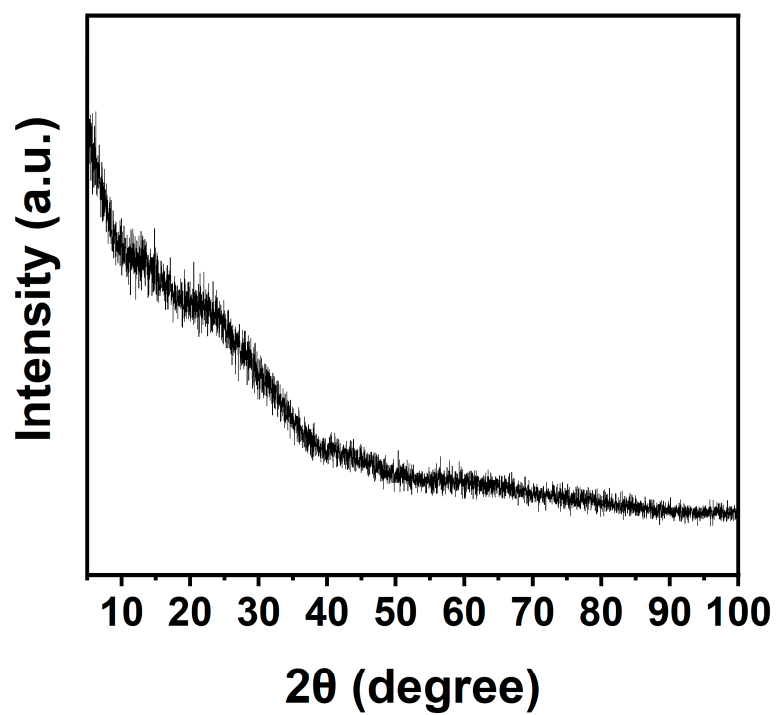

Figure S1. Wide-angle XRD patterns of CDs-60.

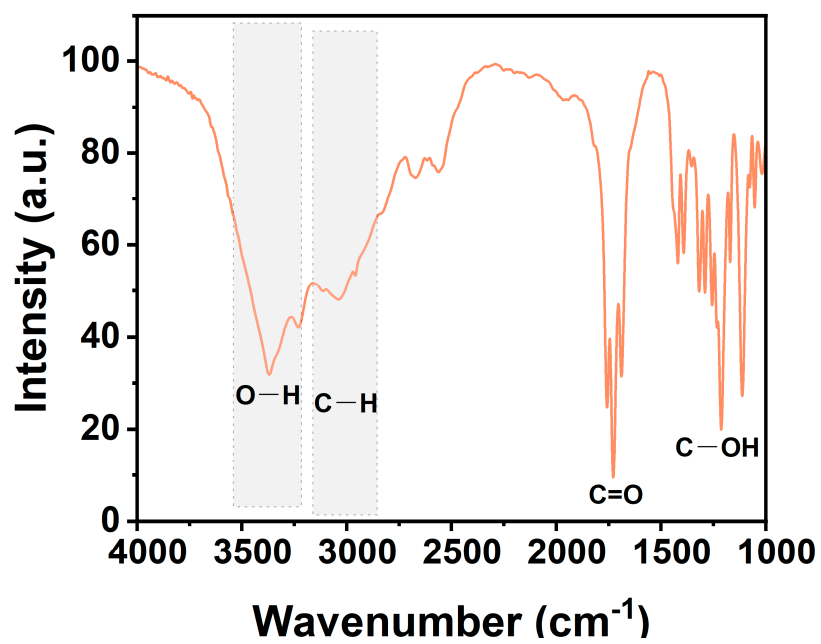

Figure S2. The FT-IR spectrum of Citric acid monohydrate.

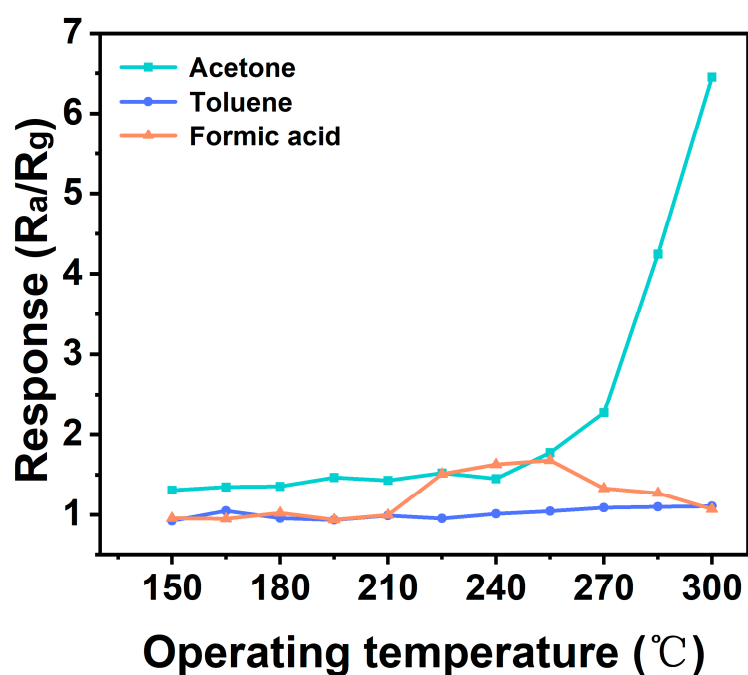

**Figure S3.** Response of SnO<sub>2</sub>/CDs-60 composite sensitive material to 100 ppm of different gases at different operating temperature.

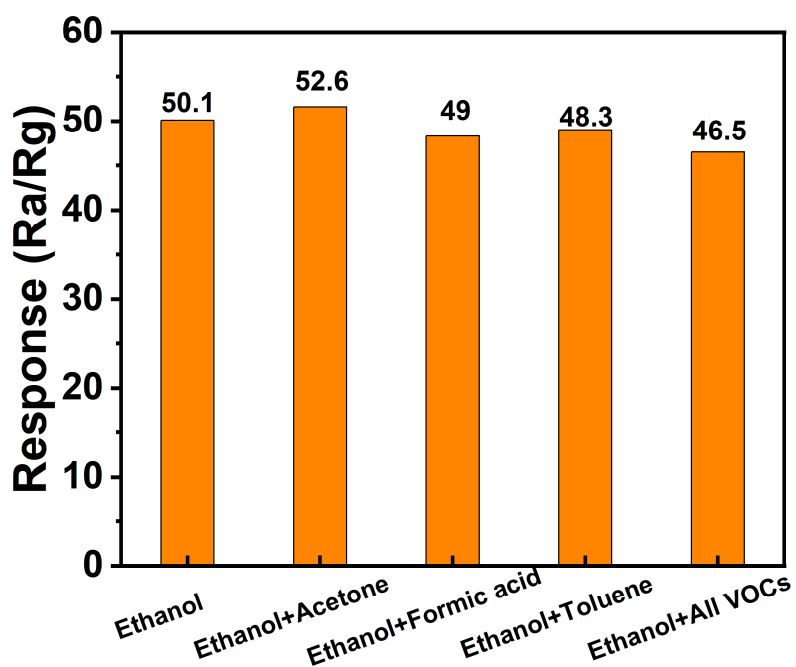

**Figure S4.** Interference resistance testing of SnO<sub>2</sub>/CDs-60 sensitive material at 225 °C.
